# Supplementary material for: Application convenient and energy-saving mechano-optics of Er3+-doped X2O2S (X = Y/Lu/Gd) for thermometry
Source: Royal Society of Chemistry journal article supplement (doi:10.1039/d3tc02259e), 2023-01-01
Supplement: d3tc02259e1.pdf [file d3tc02259e1.pdf]

*Supplementary materials*

**Application Convenient and Energy-saving Mechano-optics of Er<sup>3+</sup>-  
doped X<sub>2</sub>O<sub>2</sub>S (X=Y/Lu/Gd) for thermometry**

*Yixiao Han, Leipeng Li\*, Chongyang Cai, Pei Li, Tao Li, Xiumei Han, Dengfeng  
Peng\* and Yanmin Yang\**

Dr. Y. Han, Dr. L. Li, Dr. C. Cai, Dr. P. Li, Dr. T. Li, Prof. Y. Yang

College of Physics Science and Technology, Hebei University, Baoding 071002,  
China

E-mail: lpl@hbu.edu.cn (L. Li); yangym@hbu.edu.cn (Y. Yang)

Prof. D. Peng

College of Physics and Optoelectronic Engineering, Shenzhen University, Shenzhen  
518060, China

E-mail: pengdengfeng@szu.edu.cn

Prof. X. Han

Key Laboratory of Dielectric and Electrolyte Functional Material Hebei Province,  
Northeastern University at Qinhuangdao, Qinhuangdao 066004, China

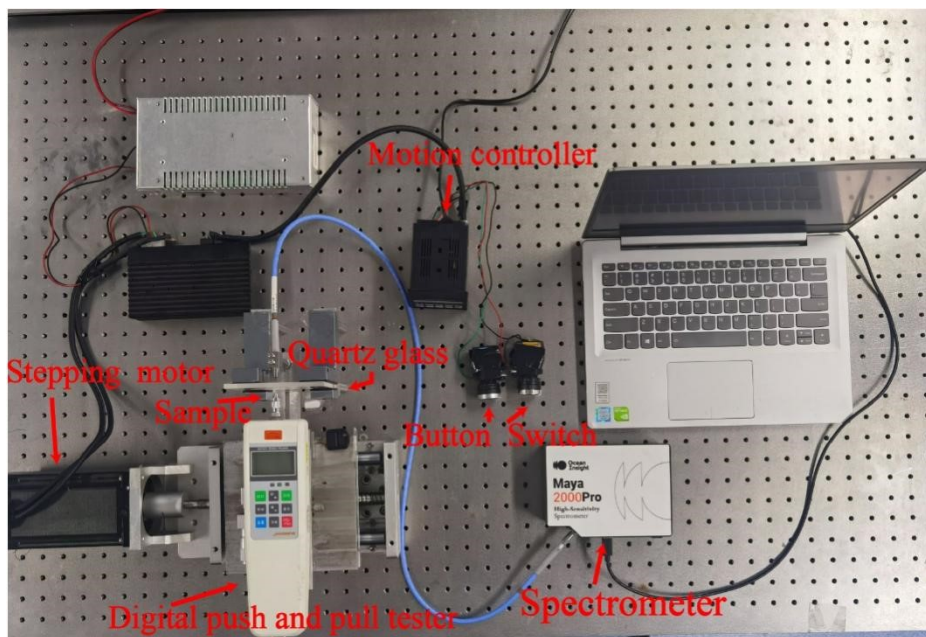

**Figure S1.** Practical experimental setup of ML measurement.

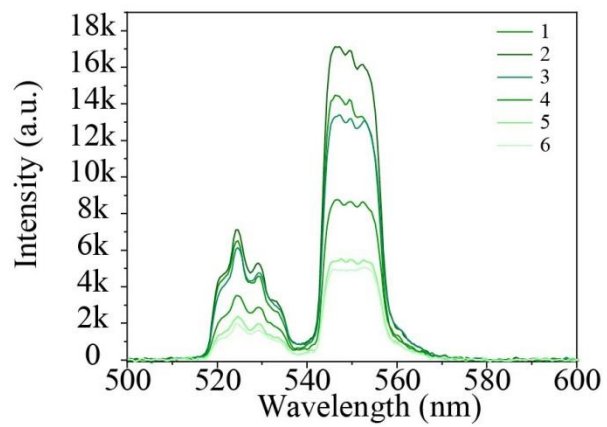

**Figure S2.** ML spectra of Y<sub>2</sub>O<sub>2</sub>S:xEr<sup>3+</sup> (x=1%, 2%, 3%, 4%, 5%, and 6%) under the same external force stimulation.

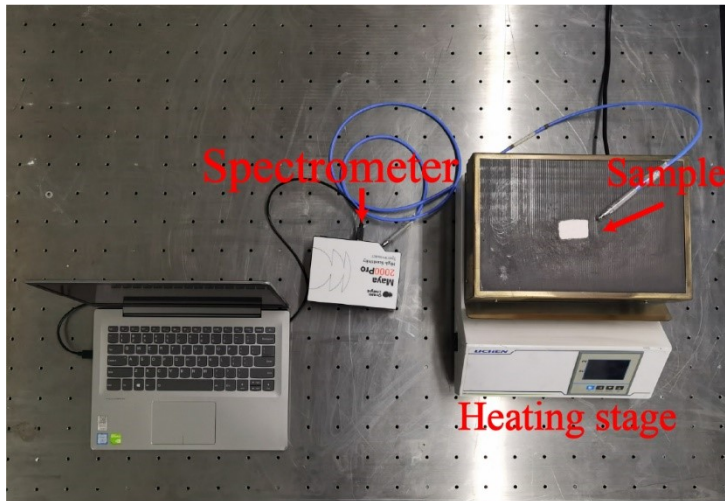

**Figure S3.** Practical experimental setup of ML measurement at different temperatures.

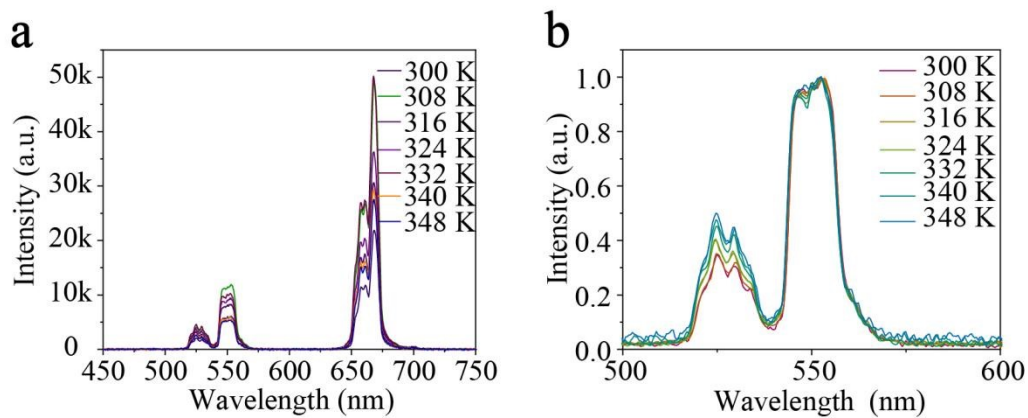

**Figure S4.** (a) Original and (b) normalized ML spectra of  $\text{Y}_2\text{O}_2\text{S}:2\%\text{Er}^{3+}$  at different temperatures from 300 to 348 K.

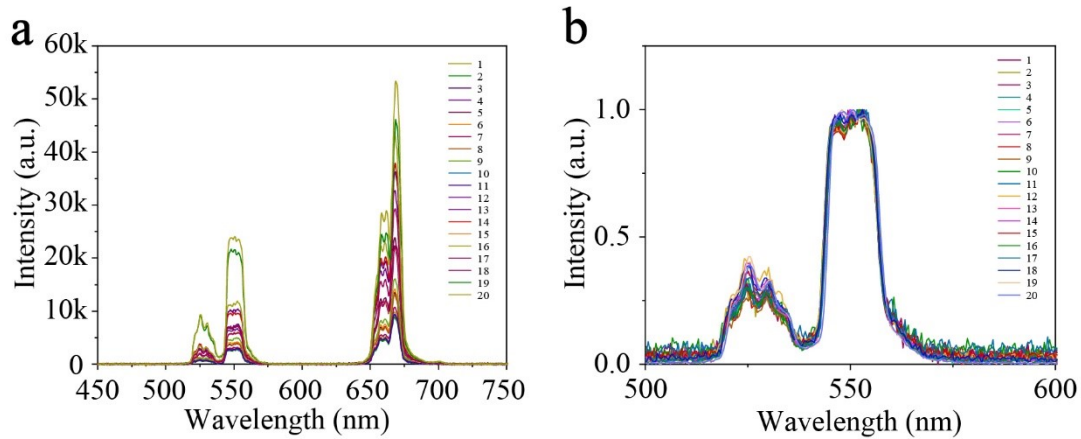

**Figure S5.** (a) Original and (b) normalized ML spectra of  $Y_2O_2S:2\%Er^{3+}$  phosphors under stimulation of different external force.

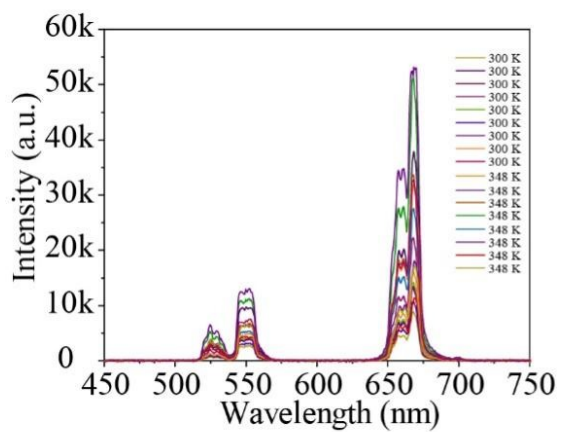

**Figure S6.** ML spectra of Y<sub>2</sub>O<sub>2</sub>S:2%Er<sup>3+</sup> phosphors at 300 K and 348 K during the heating-cooling test.

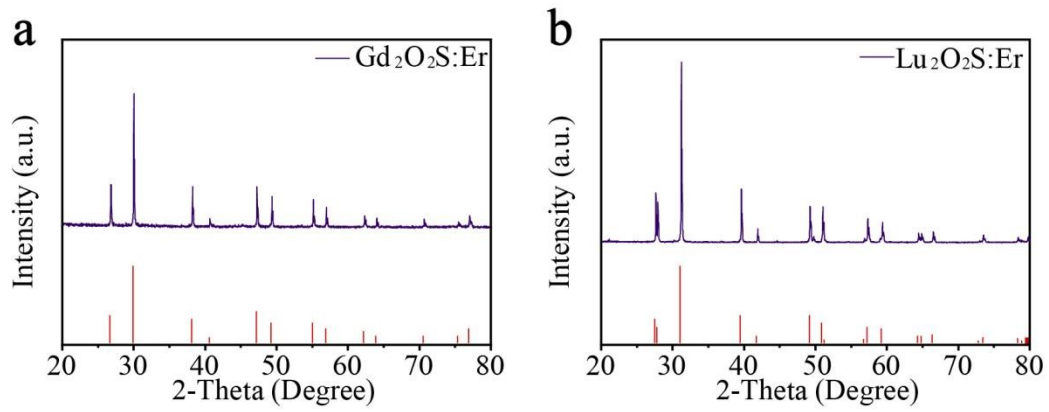

**Figure S7.** XRD results of **(a)**  $\text{Gd}_2\text{O}_2\text{S}:\text{2\%Er}^{3+}$  and **(b)**  $\text{Lu}_2\text{O}_2\text{S}:\text{2\%Er}^{3+}$ .



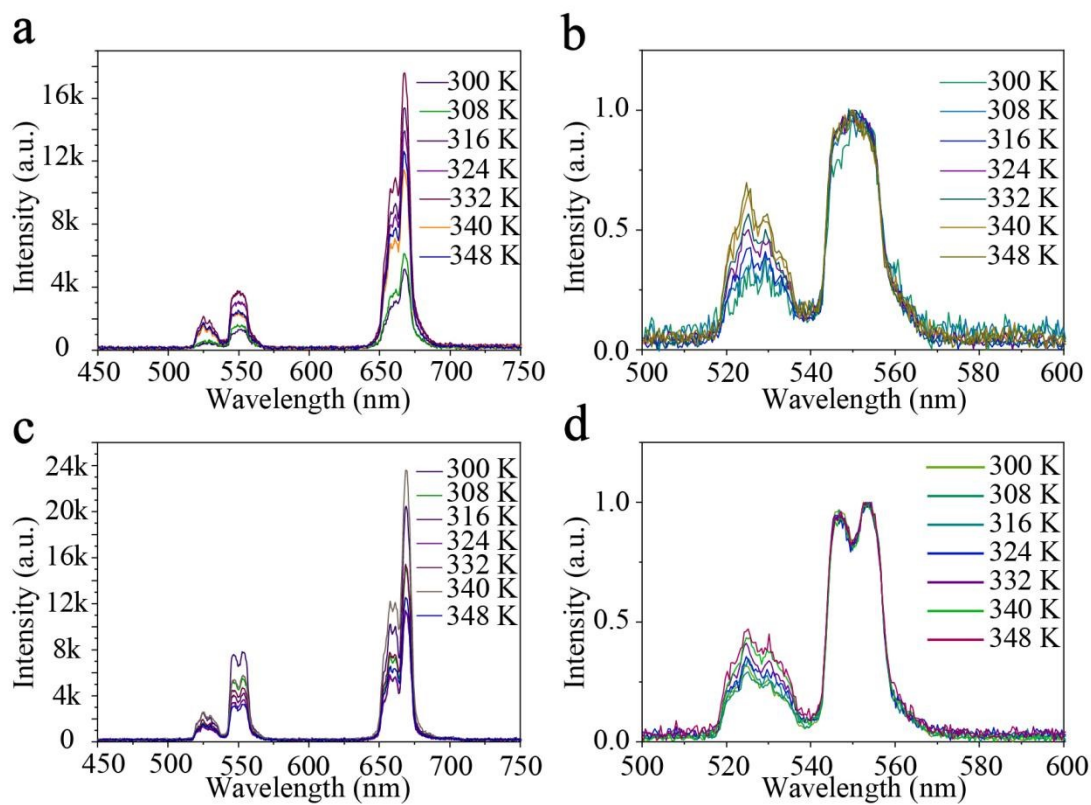

**Figure S8.** (a) Original and (b) normalized ML spectra of Gd<sub>2</sub>O<sub>2</sub>S:2%Er<sup>3+</sup> at different temperatures from 300 to 348 K. (c) Original and (d) normalized ML spectra of Lu<sub>2</sub>O<sub>2</sub>S:2%Er<sup>3+</sup> at different temperatures from 300 to 348 K.
